# Supplementary material for: Are atmospheric updrafts a key to unlocking climate forcing andsensitivity?
Source: Copernicus journal article supplement (doi:10.5194/acp-16-12983-2016), 2016-10-20
Supplement: Supplementary file [file acp-16-12983-2016-supplement-title-page.pdf › acp-16-12983-2016-supplement-title-page.pdf]

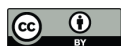

## *Supplement of*

# **Are atmospheric updrafts a key to unlocking climate forcing and sensitivity?**

**Leo J. Donner et al.**

*Correspondence to:* Leo J. Donner ([leo.j.donner@noaa.gov](mailto:leo.j.donner@noaa.gov))

- [acp-16-12983-2016-supplement-title-page.pdf](#)
- [2006011903.atmos\\_diff.nc](#)
- [2006011903.atmos\\_donner.nc](#)
- [2006011903.atmos\\_full.nc](#)
- [2006011903.atmos\\_half.nc](#)
- [2006011903.atmos\\_moist.nc](#)
- [2006011903.atmos\\_rad.nc](#)
- [2006011903.atmos\\_rad3h.nc](#)
- [2006011903.atmos\\_strat.nc](#)
- [2006011903.atmos\\_tend.nc](#)
- [2006011903.atmos\\_wind.nc](#)
- [Condition\\_Jan1923\\_3panel.png](#)
- [README](#)

The copyright of individual parts of the supplement might differ from the CC-BY 3.0 licence.
